# Supplementary material for: Distinct rates and patterns of spread of the major HIV-1 subtypes in Central and East Africa
Source: PLoS Pathog. 2019 Dec 6;15(12):e1007976. doi: 10.1371/journal.ppat.1007976 (PMC6897401; doi:10.1371/journal.ppat.1007976)
Supplement: S2 Table — AI: association index, PS: parsimony score, CI: credible interval; P: statistical significance. (XLSX) [file ppat.1007976.s002.xlsx]

## Sheet: Sheet1
Table S2. HIV-1 group M spatial admixture in the DRC. AI: association index, PS: parsimony score, CI: credible
interval; P: statistical significance.
	Observed Mean	Lower 95% CI	Upper 95% CI	Null Mean	Lower 95% CI	Upper 95% CI	P
Tree size	10891.9	10403.5	11405.3	10891.9	10891.9	10891.9	1
Internal branch size	2191.34	2081.8	2300.49	2191.34	2191.34	2191.34	0
AI	19.6227	18.8018	20.4662	28.5927	26.5567	30.8329	0
PS	162.584	156	169	231.295	220.232	240.45	0
