# Supplementary material for: Distinct rates and patterns of spread of the major HIV-1 subtypes in Central and East Africa
Source: PLoS Pathog. 2019 Dec 6;15(12):e1007976. doi: 10.1371/journal.ppat.1007976 (PMC6897401; doi:10.1371/journal.ppat.1007976)
Supplement: S7 Table — AI: association index, PS: parsimony score, CI: credible interval, P: statistical significance. (XLSX) [file ppat.1007976.s007.xlsx]

## Sheet: Sheet1
Table S7. HIV-1 subtype D spatial admixture in Central and East Africa. AI: association index, PS: parsimony score,
CI: credible interval, P: statistical significance.
	Observed Mean	Lower 95% CI	Upper 95% CI	Null Mean	Lower 95% CI	Upper 95% CI	P
Tree size	14690.2	14201.5	15271.8	14690.2	14690.2	14690.2	0
Internal branch size	1989.63	1890.89	2090.08	1989.63	1989.63	1989.63	0
AI	38.115	36.3392	40.0222	50.9801	49.9067	52.238	0
PS	348.041	339	357	402.487	398.385	406.658	0
