# Supplementary material for: Distinct rates and patterns of spread of the major HIV-1 subtypes in Central and East Africa
Source: PLoS Pathog. 2019 Dec 6;15(12):e1007976. doi: 10.1371/journal.ppat.1007976 (PMC6897401; doi:10.1371/journal.ppat.1007976)
Supplement: S8 Table — (XLSX) [file ppat.1007976.s008.xlsx]

## Sheet: Sheet1
Table S8. Most significant pathways (Bayes Factor, BF, support < 10) of subtype C
spread in Central and East Africa.
From (location, country)	To (location, country)	BF support	Intra-country	Distance (km)
Kinshasa, DRC	Lubumbashi, DRC	7342.17	yes	1493.27
FortPortal, UG	Kampala, UG	7342.17	yes	235.152
Dar_es_Salaam, TZ	Lubumbashi, DRC	7342.17	no	1339.39
Bujumbura, BI	Kigali, RW	7342.17	no	190.461
Kisumu, KE	Nairobi, KE	3666.76	yes	253.69
Kilimanjaro, TZ	Lubumbashi, DRC	3666.76	no	1471.48
Kagera, TZ	Kisumu, KE	1041.47	no	450.094
Kisumu, KE	Lubumbashi, DRC	726.434	no	1618.22
Bujumbura, BI	Kisumu, KE	341.391	no	677.875
Lubumbashi, DRC	MbujiMayi, DRC	244.829	yes	769.108
Entebbe, UG	Kyamulibwa, UG	221.065	yes	73.1535
Kinshasa, DRC	MbujiMayi, DRC	162.301	yes	856.563
Kigali, RW	Masaka, UG	144.494	no	261.542
Kilifi, KE	Kisumu, Ke	63.4189	yes	669.163
Kisumu, Ke	Mombasa, KE	58.1776	yes	689.954
Dar_es_Salaam, TZ	Kagera, TZ	45.4021	yes	959.632
Kagera, TZ	Kilimanjaro, TZ	41.0197	yes	614.482
Lubumbashi, DRC	Matadi, DRC	26.8632	yes	1549.13
Entebbe, UG	Mbale, UG	13.1	yes	213.052
Kagera, TZ	Kampala, UG	12.117	no	358.321
Bujumbura, BI	Entebbe, UG	11.4362	no	527.761
Dar_es_Salaam, TZ	Masaka, UG	11.2191	no	1089.48
Kinshasa, DRC	Matadi, DRC	10.2974	yes	260.369
